# Schizophrenia Risk Proteins ZNF804A and NT5C2 Interact at Synapses

Afra Aabdien<sup>1,2</sup>, Laura Sichlinger<sup>1,2</sup>, Nicholas J.F. Gattford<sup>1,2</sup>, Pooja Raval<sup>1,2</sup>,  
Madeleine R. Jones<sup>1,2</sup>, Lloyd Tanangonan<sup>1,2</sup>, Timothy R. Powell<sup>3,4</sup>, Rodrigo R.R.  
Duarte<sup>3,4</sup>, Deepak P. Srivastava<sup>1,2\*</sup>

<sup>1</sup>Department of Basic and Clinical Neuroscience, The Maurice Wohl Clinical  
Neuroscience Institute, Institute of Psychiatry, Psychology, & Neuroscience, King's  
College London, London, UK.

<sup>2</sup>MRC Centre for Neurodevelopmental Disorders, Institute of Psychiatry, Psychology  
and Neuroscience, King's College London, London; United Kingdom.

<sup>3</sup>Social, Genetic & Developmental Psychiatry Centre, Institute of Psychiatry,  
Psychology & Neuroscience, King's College London, London, United Kingdom.

<sup>4</sup>Department of Medicine, Weill Cornell Medical College, Cornell University, New  
York, NY, USA.

**\* = corresponding author: [deepak.srivastava@kcl.ac.uk](mailto:deepak.srivastava@kcl.ac.uk)**

26 **ABSTRACT**

27           The zinc finger protein 804A (*ZNF804A*) and the 5'-nucleotidase cytosolic II  
28 (*NT5C2*) genes have been identified as robust susceptibility genes in large-scale  
29 genome-wide association studies of schizophrenia. The *ZNF804A* and *NT5C2*  
30 proteins are highly expressed in developing and mature cortical neurons. *ZNF804A*  
31 has been implicated in regulating the development of neuronal morphology; it localises  
32 to synapses and is required for activity-dependent modifications of dendritic spines.  
33 *NT5C2* has been shown to regulate 5' adenosine monophosphate-activated protein  
34 kinase activity and implicated in influencing protein synthesis in neural progenitor cells.  
35 But despite these findings, a better understanding of the role these proteins play in  
36 regulating neuronal function is needed. A recent yeast two-hybrid screen has identified  
37 *ZNF804A* and *NT5C2* as potential interacting proteins, but whether this occurs *in situ*;  
38 and moreover, in cortical neurons, is unknown. Here we show that *ZNF804A* and  
39 *Nt5c2* colocalise and interact in hEK293T cells. Furthermore, their rodent  
40 homologues, *ZFP804A* and *NT5C2*, specifically colocalise at synapses and form a  
41 protein complex in cortical neurons. Knockdown of *Zfp804A* or *Nt5c2* resulted in a  
42 significant decrease in synaptic expression of both proteins, suggesting that both  
43 proteins are required for the synaptic targeting of each other. Taken together, these  
44 data indicate that *ZNF804A/ZFP804A* and *NT5C2* interact together in cortical neurons  
45 and indicate that these GWAS risk factors may function as a complex to regulate  
46 neuronal function.

47

48 **Keywords:** Psychosis, dendritic spine, dendrite, *ZNF804A*, *NT5C2*.

## 49 INTRODUCTION

50 Schizophrenia is a chronic psychiatric disorder of complex aetiology (Birnbaum  
51 and Weinberger, 2017; Lewis and Levitt, 2002; Rapoport et al., 2012; Smeland et al.,  
52 2020). Genome-wide association studies (GWAS) have suggested up to one third of  
53 genetic risk for schizophrenia arises from common alleles (Ripke et al., 2011) and the  
54 latest study has identified 270 independent schizophrenia risk loci (Ripke et al., 2020).  
55 The zinc finger protein 804A (*ZNF804A*) and the 5'-nucleotidase, cytosolic II (*NT5C2*,  
56 *cN-II*) genes were amongst the first ones to emerge from early GWAS of schizophrenia  
57 (O'Donovan et al., 2008; Ripke et al., 2011), and they have also been implicated in  
58 susceptibility to multiple psychiatric disorders (Amare et al., 2019; Cross-Disorder  
59 Group of the Psychiatric Genomics Consortium, 2013; Williams et al., 2011).  
60 Transcriptome-wide association studies (TWAS) have also associated *ZNF804A*  
61 (Gandal et al., 2018) and *NT5C2* (Hall et al., 2020) with schizophrenia. Ultimately,  
62 schizophrenia risk variants are associated with reduced expression of *NT5C2* (Duarte  
63 et al., 2016; Hall et al., 2020) and *ZNF804A* in the foetal and adult brain (Hill and Bray,  
64 2012; Tao et al., 2014), but the function of these proteins in mature neurons remains  
65 unclear.

66 The *ZNF804A* protein has been found to be expressed in the human cerebral  
67 cortex, particularly in pyramidal neurons (Tao et al., 2014). *ZNF804A* has also been  
68 found to localise to putative synapses, as demonstrated by co-localisation with the  
69 synaptic proteins PSD-95 and GluN1 (Deans et al., 2017). Similarly, *ZFP804A* (rodent  
70 homologue) was found to be enriched in synaptic fractions, and to localise to dendritic  
71 spines, where the majority of excitatory synapses occur in the mammalian brain  
72 (Deans et al., 2017). Consistent with a role for the encoded zinc finger protein at  
73 synapses, knockdown or knockout of *Zfp804A* resulted in a reduction of dendritic spine

74 density (Deans et al., 2017; Huang et al., 2020), whereas an increase in spine density  
75 was observed when the full length or shorter disease-associated isoform of the protein  
76 was overexpressed in cortical neurons (Dong et al., 2021; Zhou et al., 2020).  
77 Moreover, activity-dependent remodelling of dendritic spines was impaired in cortical  
78 neurons with reduced ZNF804A expression levels (Deans et al., 2017). Together,  
79 these data indicate a role for ZNF804A at synapses.

80 The NT5C2 protein also appears to be enriched in cortical neurons (Duarte et  
81 al., 2019), but relative to ZNF804A, less is known about the function of NT5C2 in the  
82 cortex. The knockdown of *NT5C2* in human neural progenitor cells is associated with  
83 increased phosphorylated 5' adenosine monophosphate-activated protein kinase  
84 (AMPK), which negatively regulates mammalian target of rapamycin (mTOR) and  
85 eukaryotic elongation factor 2 (eEF2), suggesting a role in protein translation (Duarte  
86 et al., 2019). Knockdown of *CG32549* (the *Drosophila melanogaster* homologue)  
87 causes motor defects (Duarte et al., 2019), and increased sleep in flies (Singgih et al.,  
88 2021). Whereas it appears that *NT5C2* has a function in the developing and adult  
89 brain, the precise underlying neurological mechanisms are yet to be established.

90 A recent interactome study using a yeast two-hybrid assay has indicated that  
91 ZNF804A interacts with multiple proteins, including NT5C2 (Zhou et al., 2018). Follow  
92 up studies have demonstrated that ZNF804A forms a complex with several predicted  
93 interactors to regulate neuronal morphology (Dong et al., 2021). Interestingly, it was  
94 noted that NT5C2 is the only potential interacting protein for ZNF804A, encoded by a  
95 GWAS-supported gene (Zhou et al., 2018). In this study, we investigate the subcellular  
96 localisation of ZNF804A and NT5C2, and explored whether they formed a protein  
97 complex in heterologous hEK293T cells and rodent cortical neurons. We find that  
98 ZNF804A and NT5C2 do form a protein complex in heterologous and cortical neurons.

99 Both proteins are present in multiple subcellular compartments but co-localise at or  
100 near synapses in cortical neurons. Small interfering RNA (siRNA)-mediated  
101 knockdown of either protein resulted in altered presence of both proteins at synapses.  
102 Together, these data support a model whereby two risk factors for schizophrenia may  
103 function as a complex to regulate synaptic function.

104

## 105 **RESULTS**

106

### 107 **ZNF804A and NT5C2 form a protein complex in heterologous cells.**

108 As a yeast-two hybrid assays has revealed that ZNF804A and NT5C2 are  
109 potential interacting partners (Zhou et al., 2018), we were interested in confirming this  
110 *in situ*. We first examined the localisation of ectopically expressed HA-ZNF804A and  
111 Myc-NT5C2 in hEK293T cells. Consistent with findings from Deans et al. (2017), HA-  
112 ZNF804A localised to both nuclear and cytosolic compartments (**Figure 1A**). Within  
113 the cytosol and at the plasma membrane, HA-ZNF804A co-localised with the  
114 cytoskeletal filament, F-actin probe (phalloidin) (**Figure 1A**). hEK293T cells  
115 transfected with Myc-NT5C2 showed that this protein mainly localised to the cytosol  
116 (**Figure 1B**), consistent with findings from Duarte et al. (2019). We next co-transfected  
117 HA-ZNF804A and Myc-NT5C2 into hEK293T cells and observed that HA-ZNF804A  
118 and Myc-NT5C2 co-localised in the cytoplasm and near the plasma membrane of  
119 hEK295T cells (**Figure 1C**). This was confirmed by a line graph construction, whereby  
120 the fluorescence intensity of both proteins was measured (**Figure 1D – i & ii**), and the  
121 overlap between the intensities provided evidence of co-localisation.

122 To validate these findings and further determine whether ZNF804A and NT5C2  
123 formed a protein complex, we performed a co-immunoprecipitation using hEK293T  
124 cells ectopically expressing both proteins. Cells co-transfected with HA-ZNF804A and  
125 Myc-NT5C2 were immunoprecipitated with an anti-Myc antibody to isolate NT5C2 and  
126 its interacting partners (**Figure 1E**). As expected, Myc-NT5C2 was readily detected in  
127 the immunoprecipitation (IP) sample. In addition, HA-ZNF804A was also present in  
128 the IP sample indicating that ZNF804A and NT5C2 were part of a protein complex  
129 (**Figure 1E**). Taken together, these data indicate that ZNF804A and NT5C2 co-localise  
130 in the cell cytoplasm, near the membrane, and that they form a protein complex in  
131 hEK293T cells.

132

### 133 **Subcellular distribution of ZNF804A and NT5C2 in cortical neurons.**

134 Previous work has demonstrated that ZNF804A localises to somatodendritic  
135 compartments of neurons, and particularly in dendritic spines (Deans et al., 2017). In  
136 comparison, little is known about the distribution and organisation of NT5C2 in  
137 neurons. We first sought to confirm the ZNF804A distribution *in vivo*, using cell  
138 fractions generated from mouse cortex. Cortices were subjected to a subcellular  
139 fractionation protocol yielding whole cell (non-nuclear) (P1), cytosolic (S2) and crude  
140 synaptosomal (P2) subcellular fractions (Jones et al., 2014). Synaptosomal fractions  
141 were further subjected to Triton-X100 detergent separation to produce a supernatant  
142 (S) and precipitate (P) (Jones et al., 2014) (**Figure 2A**). Consistent with our previous  
143 finding, ZFP804A was present in both cytosolic and synaptosomal fractions; however,  
144 the protein was highly enriched in synaptosomal supernatant, indicating a loose  
145 association with synaptic membrane (**Figure 2A**). As expected, PSD-95, a major

146 component of synapses and the post-synaptic density, was enriched in synaptosomal  
147 precipitate fractions indicating a tight association with synaptic membranes (**Figure**  
148 **2A**). Examination of NT5C2 distribution revealed that it was also present in cytosolic  
149 and synaptosomal fractions, although it was enriched in the cytosol. NT5C2 was only  
150 loosely associated with synaptic membrane as indicated by presence of the protein in  
151 synaptosomal supernatant fractions (**Figure 2A**). These findings corroborate that  
152 ZFP804A /ZNF804A localises to multiple subcellular compartments beyond the  
153 nucleus (Deans et al., 2017), and suggest a role for NT5C2 at synapses.

154 To further investigate the subcellular localisation of ZFP804A and NT5C2, we  
155 performed a series of immunostaining experiments in DIV20 (days *in vitro*) primary  
156 cortical neurons. Staining for endogenous ZFP804A revealed significant enrichment  
157 of this protein in the synaptic region (region adjacent to dendrite), compared to  
158 dendrites (ZFP804A puncta count: Dendrite,  $8.37 \pm 0.32$ ; Synaptic region,  $14.03 \pm 0.53$   
159 ( $t(7)=9.10$ ,  $p<0.0001$ ,  $n=8$ )) (**Figure 2B**). Staining for endogenous NT5C2 also  
160 revealed significant enrichment of this protein in the synaptic region compared to  
161 dendrites (NT5C2 puncta count: Dendrite,  $7.01 \pm 0.24$ ; Synaptic region,  $11.77 \pm 0.45$   
162 ( $U=214$ ,  $p<0.0001$ ,  $n=8$ )) (**Figure 2C**). Combined, these data indicate that ZFP804A  
163 and NT5C2 localise to both dendrites and synaptic regions, suggesting that both  
164 proteins are present within the same subcellular compartments in neurons.

165

## 166 **ZNF804A and NT5C2 colocalise and interact in cortical neurons.**

167 Considering that ZNF804A and NT5C2 form a protein complex in Hek293T  
168 cells, and that ZFP804A and NT5C2 localise to the same subcellular compartments in  
169 cortical neurons, we sought to explore whether these proteins were part of a protein

170 complex in rat cortical neurons, *in situ*. First, we examined whether both proteins co-  
171 localised together in cortical neurons. In DIV20 cortical neurons, both ZFP804A and  
172 NT5C2 were found to co-localise in synaptic regions: this is demonstrated by the  
173 multiple white and yellow arrows and the green/magenta overlap in the orthogonal  
174 projections indicated by the orange arrows (**Figure 3A**). To further confirm this  
175 synaptic colocalization, we analyzed ZFP804A puncta intensity within NT5C2 puncta  
176 in synaptic regions compared to dendrites. This revealed significantly more ZFP804A  
177 puncta overlapping within NT5C2 puncta in synaptic regions compared to dendrites  
178 (ZNF804A puncta intensity: Dendrite,  $5.16 \pm 0.27$ ; Synaptic region,  $6.60 \pm 0.44$   
179 ( $t(7)=2.78$ ,  $p=0.0065$ ,  $n=8$ )) (**Figure 3B**). The inverse relationship was also found to  
180 be true, whereby significantly more NT5C2 puncta were found to overlap with  
181 ZFP804A puncta in synaptic regions compared to dendrites (NT5C2 puncta intensity:  
182 Dendrite,  $7.34 \pm 0.31$ ; Synaptic region,  $9.54 \pm 0.52$  ( $t(7)=3.61$ ,  $p=0.0005$ ,  $n=8$ )) (**Figure**  
183 **3C**).

184 To demonstrate this colocalization represented a potential interaction between  
185 the two proteins, we performed a co-immunoprecipitation assay for ZFP804A from  
186 cortical neuron lysates. Consistent with our data from heterologous cells,  
187 immunoblotting revealed that NT5C2 was present in lysates immunoprecipitated for  
188 ZFP804A, but not for rabbit IgG (**Figure 3D**). These data indicate that ZFP804A and  
189 NT5C2 colocalize near synaptic regions in cortical neurons, and that they are part of  
190 a protein complex.

191

192 **Knockdown of *Zfp804a* or *Nt5c2* results in the redistribution of associated**  
193 **proteins.**



194 To further investigate a functional interaction between ZFP804A and NT5C2 in  
195 cortical neurons, we knocked down *Zfp804a* using a previously validated siRNA  
196 (Deans et al., 2017) in DIV15 primary rat cortical neurons. We then observed the  
197 effects of this knockdown on synaptic and dendritic NT5C2 localisation at DIV20. We  
198 first validated the efficacy of the *Zfp804a* siRNA by quantifying the number of ZFP804A  
199 puncta between *Zfp804a* siRNA knockdown, scrambled siRNA, or blank  
200 (untransfected) conditions. The *Zfp804a* siRNA was shown to successfully target  
201 ZFP804A as significantly fewer ZFP804A puncta were found in the siRNA knockdown  
202 condition compared to both the blank and scramble conditions (puncta per 10  $\mu$ m:  
203 Blank, 22.45 $\pm$ 1.44; Scramble, 22.05 $\pm$ 1.03; *Zfp804a* siRNA, 16.38 $\pm$ 1.20. One-way  
204 ANOVA:  $F(2,47)=27.04$ ,  $p<0.0001$ , Blank/siRNA Bonferroni: ( $t(5)=6.91$ ,  $p<0.0001$ ,  
205  $n=6$ ); Scramble/siRNA Bonferroni: ( $t(5)=5.46$ ,  $p<0.0001$ ,  $n=6$ )) (**Figure 4A+B**). No  
206 significant difference in ZFP804A puncta were observed between the blank or  
207 scramble conditions, indicating specificity of the siRNA treatment.

208 Next, we knocked down *Zfp804a* in DIV15 rat primary cortical neurons and  
209 observed the effects on NT5C2 puncta in dendrites and synaptic regions of DIV20  
210 cortical neurons. *Zfp804a* knockdown significantly reduced the density of NT5C2  
211 puncta in synaptic regions (puncta per 10  $\mu$ m; Synaptic region: Blank, 11.78 $\pm$ 0.93;  
212 Scramble, 11.73 $\pm$ 0.81; *Zfp804a* siRNA, 6.88 $\pm$ 0.80. Two-way ANOVA:  $F(2,102)=7.29$ ,  
213  $p=0.0011$ ; Bonferroni post hoc test ( $p<0.0001$ ,  $n=6$ )) (**Figure 4C+D**). In contrast, no  
214 effect on NT5C2 puncta number was observed in dendrites across conditions (**Figure**  
215 **4D**).

216 To further probe the nature of this functional interaction, we then performed the  
217 inverse experiment to understand if *Nt5c2* expression can influence ZFP804A  
218 localization. We knocked down *Nt5c2* using an siRNA previously validated (Duarte et

219 al., 2019), in DIV15 rat primary cortical neurons. We then observed the effects of the  
220 knockdown on synaptic and dendritic ZFP804A localisation at DIV20, to allow for  
221 sufficient protein turnover. We first validated the efficacy of two siRNAs for *Nt5c2* via  
222 immunoblotting comparing between siRNA A or B knockdown, scrambled siRNA, or  
223 blank (untransfected) conditions. This revealed the *Nt5c2* siRNA A successfully  
224 targeted and knocked down NT5C2 in primary rat cortical neurons, as a clear decrease  
225 in protein expression was observed in this condition compared to both the siRNA B,  
226 blank, and scramble conditions (**Figure 5A**). No difference in NT5C2 protein  
227 expression was observed between the blank or scramble conditions, indicating  
228 specificity of the siRNA treatment.

229 We knocked down *Nt5c2* in DIV15 rat primary cortical neurons and observed  
230 the effects on ZFP804A puncta in dendrites and synaptic regions of DIV20 rat primary  
231 cortical neurons. The knockdown significantly reduced the number of ZFP804A puncta  
232 in synaptic regions (puncta per 10  $\mu\text{m}$ ; Synaptic region: Blank,  $13.28 \pm 1.34$ ; Scramble,  
233  $12.47 \pm 0.48$ ; *Nt5c2* siRNA A,  $6.91 \pm 2.43$ . Two-way ANOVA:  $F(2,12)=6.07$ ,  $p=0.0151$ ;  
234 Bonferroni post hoc test (Blank/scramble,  $p=0.0113$ ,  $n=3$ ; Scramble/siRNA A,  
235  $p=0.026$ ,  $n=3$ ) (**Figure 5B+C**). Similar to the ZFP804A knockdown, no effect on  
236 ZFP804A puncta was observed in dendrites when *Nt5c2* was knocked down. These  
237 data suggest a bidirectional signalling interaction occurs between NT5C2 and  
238 ZFP804A which operate in concert at synapses but not in dendrites.

239

## 240 DISCUSSION

241 Mutations in multiple key synaptic genes have been previously associated with  
242 schizophrenia pathogenesis (Forrest et al., 2018; Penzes et al., 2011), but the precise

243 nature of how these molecules interact to impair synapses in schizophrenia is  
244 unknown. *ZNF804A* and *NT5C2* are robust schizophrenia susceptibility genes (Ripke  
245 et al., 2020), that have been previously suggested to interact (Zhou et al., 2018). In  
246 this context, *ZNF804A* has been previously characterised as having roles in mediating  
247 activity-dependent structural plasticity of dendritic spines, neurite outgrowth, protein  
248 translation and gene transcription (Deans et al., 2017; Hill et al., 2012; Zhou et al.,  
249 2018). *NT5C2*, in turn, is a nucleotidase that regulates AMPK signalling, and has  
250 putative effects on protein translation (Duarte et al., 2019). However, the molecular  
251 mechanisms underlying their association with schizophrenia, or how they relate to  
252 synaptic function or to each other, remains unclear. Here, we show *ZNF804A* and  
253 *NT5C2* colocalise and localise to synapses in cortical neurons, and that they are part  
254 of a protein regulatory network that is able to bidirectionally regulate itself, whereby  
255 expression of one protein regulates the expression of the other. This furthers our  
256 understanding of the role these proteins may play at synapses, and further suggest  
257 how both proteins may contribute to synaptic dysfunction in schizophrenia.

258 In this study we demonstrate that exogenous *ZNF804A* and *NT5C2* form a  
259 protein complex in hEK293T cells. Further, we show that their rodent homologues,  
260 *ZNF804A* and *NT5C2* are part of a protein complex in primary cortical neurons,  
261 although the consequence of this interaction is unclear. One biological function that  
262 both proteins appear to jointly regulate is protein translation. *ZNF804A* interacts with  
263 several proteins involved in protein translation, and has been shown to regulate the  
264 rate of protein synthesis in hEK293 and CAD cells (Zhou et al., 2018). *NT5C2* has also  
265 been shown to regulate the activity of the 40S ribosomal protein RPS6, which is  
266 associated with protein translation (Duarte et al., 2019). Based on their predicted  
267 function and localization at synapses, we hypothesize that their interaction results in

268 a protein complex (formed in combination with other proteins, as described in Zhou et  
269 al. (2018)) responsible for regulating local protein translation. Furthermore, defects in  
270 ZNF804A or NT5C2 may contribute to dysfunctional local synaptic protein synthesis  
271 in neurological disorders. Indeed, dysregulated protein synthesis has been shown in  
272 schizophrenia patient-derived olfactory neuronal cells and induced pluripotent stem  
273 cell-derived forebrain neural progenitor cells from schizophrenia patients (English et  
274 al., 2015; Topol et al., 2015). Common genetic variants in ZNF804A or NT5C2 could,  
275 therefore, be at least partly responsible for the dysregulation in protein translation  
276 observed in association with schizophrenia. Future studies are warranted to explore if  
277 a ZNF804A/NT5C2 protein complex could influence protein translation.

278 A second major finding in this study is the description of the subcellular  
279 distribution of ZNF804A and NT5C2 in cortical neurons. Both ZNF804A and NT5C2  
280 were present in multiple subcellular compartments in cortical neurons. Consistent with  
281 our previous work (Deans et al., 2017), ZFP804A was present in cytosolic and  
282 synaptosomal fractions from cortical neurons. Interestingly, ZFP804A was  
283 predominately present in the supernatant fraction of synaptosomes following  
284 detergent separation. This indicates that ZFP804A is transiently, or 'loosely',  
285 associated with the synaptic membrane. NT5C2 was also present in both cytosolic  
286 and synaptosomal preparations; however, this protein was more abundant in the  
287 cytosolic fraction. In synaptosomal fractions, NT5C2 was also abundant in supernatant  
288 fraction of synaptosomes following detergent separation. The similar distributions of  
289 both proteins were further reflected by immunostaining. To note, our assessment of  
290 'synaptic regions' by immunostaining as well as our subcellular fractionation protocol  
291 does not distinguish protein from being present in both pre- and post-synaptic  
292 compartments. Using super-resolution imaging, ZFP804A has been localised to pre-

293 synaptic terminals as well as post-synaptic dendritic spines (Deans et al., 2017). It  
294 remains to be determined whether NT5C2 can be found in either, or both pre- and  
295 post-synaptic compartments. Nevertheless, our data indicates that rodent NT5C2 and  
296 ZNF804A colocalise in synaptic regions. Coupled with our co-immunoprecipitation  
297 data, this could indicate that these two proteins functionally interact in this region.

298         A limitation of our study is that, although the knockdown of either *Zfp804A* or  
299 *Nt5c2* in primary cortical neurons resulted in a loss of either protein specifically from  
300 synaptic regions, it is challenging to determine whether this was caused by a direct  
301 removal of the protein from synapses, or due to a loss of the synapses altogether. For  
302 example, siRNA-mediated knockdown of *Zfp804A* also results in the loss of dendritic  
303 spines (Deans et al., 2017). Therefore, the apparent reduction of NT5C2 in synaptic  
304 regions could be driven by the fact that there are fewer dendritic spines for the protein  
305 to localise to. NT5C2 can signal through AMPK; activation of this kinase has been  
306 shown to induce dendritic spine loss (Mairet-Coello et al., 2013). Thus, knockdown of  
307 *Nt5c2* could induce dendritic spine loss through AMPK activation. A better  
308 understanding of how synaptic structures are regulated will allow us to clarify the role  
309 of NT5C2 and ZNF804A proteins at synapses.

310         There is a growing appreciation of the need to understand how genetic risk  
311 factors interact with each other and with environmental factors. It is posited that such  
312 interactions likely shape and contribute to complex genetic disorders such as  
313 schizophrenia. Recent studies have begun to dissect how different genetic risk factors  
314 can act in a synergistic manner to converge on common biological processes to  
315 increase risk for psychiatric disorders (Schrode et al., 2019). In this study, we  
316 demonstrate that two genetic risk factors for psychiatric disorders co-localise and form  
317 a protein complex at synapses, thus revealing a novel understanding of these

318 schizophrenia susceptibility genes. While additional research is required to  
319 understand the function of a ZNF804A and NT5C2 protein complex, these data  
320 support a model whereby genetic risk factors may directly work in a co-operative or  
321 non-additive manner to increase risk for schizophrenia.

322

## 323 **METHODS**

### 324 **Cell Culture**

325 Human embryonic kidney (HEK293) cells were maintained in a 37°C/5% CO<sub>2</sub>  
326 atmosphere in DMEM:F12 (Sigma, D6421) supplemented with 10% foetal bovine  
327 serum (ClonTech, 631107), 1% L-glutamine (Sigma, G7513), and 1%  
328 penicillin/streptomycin (Life Technologies, 15070063). Cells were passaged and  
329 plated at 30-40% confluency on 1.5H 18 mm glass coverslips 24 hours prior to  
330 transfection.

331 Primary cortical neuronal cultures were harvested from pregnant Sprague-  
332 Dawley rats at embryonic day 18 as described previously (Srivastava et al., 2011).  
333 Animals were habituated for 3 days before experimental procedures, which were  
334 carried out in accordance with the Home Office Animals (Scientific procedures) Act,  
335 United Kingdom, 1986. Cells were seeded on 1.5H 13 mm glass coverslips coated  
336 with poly-D-lysine 10 µg/mL (Sigma, P0899) diluted in 1X borate buffer (Thermo  
337 Scientific, 28341) at a density of  $3 \times 10^5$ /well equating to 857/mm<sup>2</sup>. Cells were cultured  
338 in feeding media: neurobasal medium (21103049) supplemented with 2% B27  
339 (17504044), 0.5 mM glutamine (25030024), and 1% penicillin/streptomycin  
340 (15070063) (all reagents from Life Technologies, UK). After 4 days in vitro (DIV), 200  
341 µM of d,l-amino-phosphonovalerate (d,l-APV, ab120004; Abcam) was added to media

342 to maintain neuronal health over long-term culture and to reduce cell death due to  
343 excitotoxicity (Srivastava et al., 2011). Fifty percent media changes were performed  
344 twice weekly until the desired time in culture was reached (DIV20), at which point cells  
345 were transfected or lysed.

346

## 347 **Transfection**

348 hEK293T cells and primary cortical neurons were transfected using  
349 Lipofectamine 2000 (Life Technologies, 11668019). Briefly, 3  $\mu$ l Lipofectamine 2000  
350 was mixed with 1  $\mu$ g of each HA-ZNF804A (Origene, RG211363) or Myc-NT5C2  
351 (Origene, RC200194) plasmid construct in DMEM:F12 (Sigma, D6421) or neurobasal  
352 medium (primary cortical neurons only). DNA:Lipofectamine mixtures were incubated  
353 in a 37°C/5% CO<sub>2</sub> atmosphere for 20 minutes before being added dropwise to plated  
354 hEK293T cells or primary cortical neurons. Transfected hEK293 cells were then further  
355 incubated in a 37°C/5% CO<sub>2</sub> atmosphere for 24-48 hours before being fixed for  
356 immunocytochemistry or lysed for immunoblotting accordingly. Transfected primary  
357 cortical neurons were incubated in a 37°C/5% CO<sub>2</sub> atmosphere overnight during  
358 transfection, then transferred back to feeding media the following day to maintain their  
359 viability before being fixed for immunocytochemistry or lysed for immunoblotting  
360 accordingly 24 hours later.

361 Short interfering RNA (siRNA) mediated knockdown of *Zfp804a* (the rat  
362 homolog of *ZNF804A*) in rat primary cortical neurons was conducted using the N-Ter  
363 Nanoparticle siRNA Transfection System (Sigma: N2788) at DIV15 per manufacturer's  
364 instructions. The siRNA targeted exon 2 of *Zfp804a* and all results were compared to  
365 Blank (N-TER, no transfection), Scramble (negative control) conditions. Briefly,

366 neurobasal feeding media was removed and replaced with neurobasal transfection  
367 media (containing all feeding media components, but without penicillin/streptomycin)  
368 with 1X APV prior to transfection. For 3 ml media, (1 ml per condition), the following  
369 concentrations were required: 14.04  $\mu$ l of siRNA dilution buffer (Sigma: N0413) was  
370 added to 1  $\mu$ l Double stranded deoxyribonucleic acid (dsDNA): Blank (N-TER),  
371 Scramble (negative control GC duplex, Thermo Scientific: 465372) or siRNA (Thermo  
372 Scientific: HSS150613). In a separate mixture, 7.2  $\mu$ l N-TER was mixed with 37.8  $\mu$ l  
373 nuclease free water. The transfection mixture and individual siRNA conditions were  
374 vortexed for 30 seconds and spun down with a microcentrifuge. Finally, 15  $\mu$ l N-TER  
375 transfection mixture was added to each of the conditions, vortexed, spun down and  
376 kept in the dark for 20 minutes at room temperature. Each condition was added  
377 dropwise to the relevant coverslips and incubated at 37°C/5% CO<sub>2</sub> for 5 days prior to  
378 immunocytochemistry.

379 siRNA mediated knockdown of *Nt5c2* in rat primary cortical neurons was  
380 conducted using the Trilencer 27-mer NT5C2 siRNA kit (Origene: SR307908) at DIV15  
381 per manufacturer's instructions. Briefly, primary cortical neurons were fed with 1X d,l  
382 -APV in neurobasal feeding media for 30 minutes prior to transfection. SiRNA A (sense  
383 sequence, 5'- UGAGAAGUAUGUAGUCAAGAUGGA -3') and siRNA B (sense  
384 sequence, 5'- ACAACUGUAAUAGCUAUUGGUCUTC -3') conditions were compared  
385 to Blank (N-TER, no transfection), Scramble (negative control sense sequence, 5'-  
386 CGUUAUCGCGUAUAAUACGCGUAT-3'). N-TER was mixed with Opti-MEM (Life  
387 Technologies: 31985-047) at a 1:50 ratio per manufacturer's instructions. Mixtures  
388 were vortexed and spun down using a microcentrifuge, then kept in the dark for 30  
389 minutes at room temperature. Each mixture was added dropwise to the relevant  
390 coverslips and incubated at 37°C/5% CO<sub>2</sub> for 5 days prior to immunocytochemistry.



391

## 392 **Immunocytochemistry & Microscopy**

393           Rat primary cortical neurons and hEK293T cells were fixed in 4% sucrose and  
394 4% formaldehyde for 10 minutes with agitation. Coverslips were washed in phosphate  
395 buffered saline (PBS) and then incubated in ice cold methanol for 10 minutes. Cells  
396 were permeabilized in 0.1% Triton-X100 (Alfa Aesar, A16046) in PBS and blocked  
397 simultaneously in 2% normal goat serum (NGS – Cell Signaling Technology, 5425) in  
398 PBS for one hour with agitation. Coverslips were subsequently incubated with primary  
399 antibodies diluted in 2% NGS+PBS in a humidified chamber overnight at 4°C. The  
400 following day, coverslips were washed 3x in PBS for 15 minutes each and were  
401 incubated with secondary antibodies diluted in 2% NGS+PBS in a humidified chamber  
402 at room temperature for one hour. Coverslips were washed 3x in PBS for 15 minutes  
403 each. Lastly, cells were counterstained using 4',6-Diamidino-2-Phenylindole (DAPI –  
404 Life Technologies, D1306) diluted in PBS before being mounted on microscope slides  
405 with ProLong Gold Antifade Mountant (Life Technologies, P36930) and left to dry for  
406 48 hours prior to confocal imaging. Primary antibodies included anti-ZNF804A C2C3  
407 rabbit polyclonal (GeneTex, GTX121178, 1:200), anti-NT5C2 mouse monoclonal  
408 (Abnova, H00022978-M02, 1:200), anti-NT5C2 rabbit polyclonal (Abcam, ab96084,  
409 1:750), anti-MAP2 chicken polyclonal (Abcam, ab92434, 1:1000), anti-PSD95 guinea  
410 pig polyclonal (Synaptic Systems, 124014, 1:500), anti-GFP rabbit polyclonal  
411 (Origene, TA150032, 1:10,000), anti-HA mouse monoclonal (BioLegend, 901503,  
412 1:1000), and anti-Myc mouse monoclonal (BioLegend, 626802, 1:1000). Actin  
413 filaments were stained using ActinGreen™ 488 (Life Technologies, R37110) or  
414 ActinRed™ 555 (Life Technologies, R37112) ReadyProbes™ per manufacturer's  
415 instructions. Secondary antibodies included Alexa Fluor 488 goat anti-rabbit (A11034,

416 1:750), Alexa Fluor 568 goat anti-mouse (A11031, 1:750), Alexa Fluor 633 goat anti-  
417 guinea pig (A21105, 1:500), Alexa Fluor goat anti-chicken (A21449, 1:750) (all  
418 Invitrogen), and Alexa Fluor 405 goat anti-chicken (Abcam, ab175675, 1:500).

419 All experiments were imaged using a Leica SP-5 confocal microscope using a  
420 Plan-Apochromatic 63x 1.40 NA oil-immersion objective (Leica microsystems,  
421 506210). Fluorophores were excited using a 100 mW Ar laser (458, 476, 488, 496,  
422 514 nm lines), 10 mW Red He/Ne (633 nm), and 50 mW 405 nm diode laser. Z-stacks  
423 of each cell were acquired for all conditions at 0.5  $\mu$ m step size using Leica Application  
424 Suite – Advanced Fluorescence software (LAS-AF; v2.7.3) installed on a  
425 corresponding desktop computer running Windows XP (Microsoft, SP3). All Z-stacks  
426 were exported to ImageJ (<https://imagej.nih.gov/ij/> v1.51j 8) where maximum intensity  
427 projections and background subtracted images were generated (Schneider et al.,  
428 2012).

429

### 430 **Co-Immunoprecipitation, Cell Fractionation & Immunoblotting**

431 hEK293 cells transfected with GFP-ZNF804A, HA-ZNF804A, or Myc-NT5C2  
432 were lysed in co-immunoprecipitation (co-IP) buffer consisting of 10 mM Tris; pH7.4,  
433 150 mM NaCl, 1% Triton-X100, 0.1% SDS, 1% Deoxycholate, 5 mM EDTA combined  
434 with a protease/phosphatase inhibitor cocktail consisting of 1 mM AEBSF, 10  $\mu$ g/ml  
435 Leupeptin, 1  $\mu$ g/ml Pepstatin A, 2.5  $\mu$ g/ml Aprotinin, 0.5 M NaF, and 1%  
436 serine/threonine phosphatase inhibitor cocktail #3 (Sigma, P0044). Detergent soluble  
437 lysates were sonicated for 10 pulses at 35% power and centrifuged at 15,000 rpm for  
438 15 minutes at 4°C to remove cell debris, samples were then placed on ice for 30  
439 minutes. An input sample of 75  $\mu$ l was removed from the lysate and protein  
440 concentration was assessed using a Pierce Bicinchoninic acid (BCA) protein assay kit

441 (Thermo Scientific, 10678484). Concomitantly, 50 µl magnetic Dyna Beads Protein A  
442 (Invitrogen, 10002D) were washed in 500 µl tris buffered saline+0.05% NP40 wash  
443 buffer containing 8 µl ZNF804A antibody or 8 µl control Rabbit immunoglobulin (IgG)  
444 (Santa Cruz Biotechnology, sc-2027). Samples were incubated at 4°C for 3 hours on  
445 a rotator before being placed in a DynaMag™-2 magnetic rack (Thermo Scientific,  
446 12321D) and washed twice with TBS+NP40 wash buffer. 150-200 µl total lysate was  
447 equally added to ZNF804A or control normal rabbit IgG-bound beads. The samples  
448 were then left rotating overnight at 4°C. The following day, co-IP samples were  
449 returned to the magnetic rack, 50 µl of flow through was removed, and underwent BCA  
450 analysis to determine protein concentration. The beads were washed in TBS+NP40  
451 wash buffer and resuspended in 50 µl Laemmli sample buffer (Bio-Rad Laboratories,  
452 161-0737) which were subsequently boiled at 95°C for 5 minutes to denature.

453 Cell fraction samples were prepared as follows. Cortical tissue from four 16  
454 week old male CD1 mice were homogenized in 10x v/w of homogenisation buffer (0.32  
455 M sucrose, 1 mM NaHCO<sub>3</sub>, 1 mM MgCl<sub>2</sub>) using a glass Dounce tissue homogenizer  
456 for 10 strokes. Samples were then centrifuged at 4°C and at 200 RCF for 5 minutes:  
457 the nuclear fraction (P1) was discarded, and supernatant containing the extranuclear  
458 cell fraction (S1) retained. An aliquot of the S1 fraction was then centrifuged at 14,000  
459 RCF for 15 minutes to produce the cytosolic fraction (S2 - supernatant) and crude  
460 synaptosomes (P2 – pellet) fractions. The P2 pellet was resuspended in 1% Triton X-  
461 100 buffer (20% v/v Triton X-100) with inhibitors. A further aliquot from the  
462 resuspended P2 fractions were then centrifuged at 14,000 RCF for 15 minutes:  
463 supernatant contain the ‘lightly bound’ synaptic fraction (P2S); the pellet was  
464 resuspended in homogenisation buffer and contained the ‘tightly bound’ synaptic  
465 fraction (P2P). All samples were then stored at -80°C.

466 Samples were resolved by SDS-PAGE, transferred to a PVDF membrane and  
467 blocked for 1 hour in 5% bovine serum albumin (Sigma, A7906) in TBS+0.01%  
468 Tween20. Membranes were then immunoblotted with primary antibodies overnight at  
469 4°C, followed by 3x 15 minute washes in TBS-T. Membranes were then incubated with  
470 anti-mouse (Life Technologies, A16078, 1:10,000) or anti-rabbit (Life Technologies,  
471 G-21234, 1:10,000) horseradish peroxidase (HRP) conjugated secondary antibodies  
472 for 1 hour at room temperature, followed by 3x 15 minute washes in TBS-T.  
473 Membranes were then incubated in Pierce electrochemiluminescence substrate  
474 (Thermo Scientific, 170-5061) for 5 minutes and subsequently scanned using a Bio-  
475 Rad ChemiDoc MP (Bio-Rad). Band intensity was quantified by densitometry using  
476 Image Lab software (Bio-Rad, v6.0.1).

477

#### 478 **Quantification & Statistical Analysis**

479 Dendritic spine puncta were quantified from secondary and tertiary dendrites of  
480 microtubule associated protein 2 (MAP2) positive neurons. Images of 3 neurons per  
481 condition per culture were analyzed of 6 biological replicate cultures, approximately  
482 100  $\mu\text{m}$  of the dendrite was selected from 2-3 different dendrites per image. The areas  
483 of the dendrite and spine region (2  $\mu\text{m}$  on either side of the dendrite) were traced  
484 manually and thresholded to select puncta sizes of 0.08-2  $\mu\text{m}^2$  for analysis. Puncta  
485 count within the dendritic region was compared to puncta count in the synaptic region  
486 in synaptic localization, synaptic colocalization and knockdown experiments. All  
487 images were background subtracted to exclude non-specific staining in ImageJ prior  
488 to quantification.

489 All datasets were subjected to outlier detection using the ROUT method (robust  
490 regression and outlier removal – (Motulsky and Brown, 2006)) in GraphPad Prism

491 (v8.0.2 – Windows, GraphPad Software, San Diego, California USA,  
492 <http://www.graphpad.com>), detected outliers were removed from their corresponding  
493 dataset. All datasets were also tested for normality using the D'Agostino & Pearson  
494 normality test to identify which datasets required parametric or non-parametric  
495 analyses (D'agostino et al., 1990). All statistical analyses used an alpha level of 0.05.  
496 Non-parametric Mann-Whitney U test was used to analyse all synaptic localisation and  
497 synaptic colocalization data. Ordinary one-way analysis of variance (ANOVA) with  
498 Bonferroni correction for multiple comparisons was used for analysing ZFP804A  
499 puncta in ZFP804A knockdown experiments. Two-way ANOVA with Tukey's test for  
500 multiple comparisons was used for analysing the effects of ZFP804A knockdown on  
501 NT5C2 puncta. Two-way ANOVA with Tukey's test for multiple comparisons was also  
502 used for analysing the effects of NT5C2 knockdown on ZFP804A puncta. All data are  
503 shown as mean  $\pm$  standard error of the mean (SEM) and all error bars represent SEM.

504

## 505 **Acknowledgements**

506 This work was supported by grants from UK Medical Research Council, Grant No.  
507 MR/L021064/1 to DPS; UK Medical Research Council Centre for Neurodevelopmental  
508 Disorders (Grant No. MR/N026063/1); Royal Society UK (Grant RG130856) to DPS;  
509 Independent Researcher Award from the Brain and Behavior Foundation (formally  
510 National Alliance for Research on Schizophrenia and Depression (NARSAD) (Grant  
511 No. 25957), awarded to D.P.S.; L.S. is supported by the UK Medical Research Council  
512 (MR/N013700/1) and King's College London member of the MRC Doctoral Training  
513 Partnership in Biomedical Sciences; P.R. was funded by a BBSRC-iCASE studentship  
514 (BB/M503356/1); R.R.R.D. received funds from the Coordenação de Aperfeiçoamento

515 de Pessoal de Nível Superior (CAPES, BEX1279/13-0). We thank the Wohl Cellular  
516 Imaging Centre for their help with imaging.

517

## 518 **Author Contributions**

519 A.A., L.S., N.J.F.G., P.R., M.R.J., L.T. and D.P.S. performed all experiments and  
520 subsequent analysis. D.P.S., T.R.P. and R.R.R.D. designed the project and  
521 experiments. A.A., N.J.F.G., and D.P.S. write the initial draft of the manuscript; A.,  
522 L.S., N.J.F.G., P.R., M.R.J., L.T., T.R.P. and R.R.R.D. and D.P.S. edited and finalized  
523 the manuscript.

524

## 525 **Conflict of interest**

526 The authors declare that they have no conflict of interest.

527

## 528 **References**

529

530 Amare, A.T., Vaez, A., Hsu, Y.-H., Direk, N., Kamali, Z., Howard, D.M., McIntosh, A.M.,  
531 Tiemeier, H., Bültmann, U., Snieder, H., 2019. Bivariate genome-wide association  
532 analyses of the broad depression phenotype combined with major depressive  
533 disorder, bipolar disorder or schizophrenia reveal eight novel genetic loci for  
534 depression. *Molecular psychiatry*, 1-10.

535 Birnbaum, R., Weinberger, D.R., 2017. Genetic insights into the neurodevelopmental  
536 origins of schizophrenia. *Nature Reviews Neuroscience* 18, 727-740.

537 Cross-Disorder Group of the Psychiatric Genomics Consortium, 2013. Identification of  
538 risk loci with shared effects on five major psychiatric disorders: a genome-wide  
539 analysis. *Lancet* 381, 1371-1379.

540 D'agostino, R.B., Belanger, A., D'Agostino Jr, R.B., 1990. A suggestion for using  
541 powerful and informative tests of normality. *The American Statistician* 44, 316-321.

542 Deans, P.M., Raval, P., Sellers, K.J., Gatford, N.J., Halai, S., Duarte, R.R., Shum, C.,  
543 Warre-Cornish, K., Kaplun, V.E., Cocks, G., 2017. Psychosis risk candidate ZNF804A  
544 localizes to synapses and regulates neurite formation and dendritic spine structure.  
545 *Biological psychiatry* 82, 49-61.

546 Dong, F., Mao, J., Chen, M., Yoon, J., Mao, Y., 2021. Schizophrenia risk ZNF804A  
547 interacts with its associated proteins to modulate dendritic morphology and synaptic  
548 development. *Mol Brain* 14, 12.

549 Duarte, R.R., Bachtel, N.D., Côtel, M.-C., Lee, S.H., Selvackadunco, S., Watson, I.A.,  
550 Hovsepian, G.A., Troakes, C., Breen, G.D., Nixon, D.F., 2019. The psychiatric risk  
551 gene NT5C2 regulates adenosine monophosphate-activated protein kinase signaling  
552 and protein translation in human neural progenitor cells. *Biological psychiatry* 86, 120-  
553 130.

554 Duarte, R.R., Troakes, C., Nolan, M., Srivastava, D.P., Murray, R.M., Bray, N.J., 2016.  
555 Genome-wide significant schizophrenia risk variation on chromosome 10q24 is  
556 associated with altered cis-regulation of BORCS7, AS3MT, and NT5C2 in the human  
557 brain. *American Journal of Medical Genetics Part B: Neuropsychiatric Genetics* 171,  
558 806-814.

559 English, J.A., Fan, Y., Föcking, M., Lopez, L.M., Hryniewiecka, M., Wynne, K., Dicker,  
560 P., Matigian, N., Cagney, G., Mackay-Sim, A., 2015. Reduced protein synthesis in  
561 schizophrenia patient-derived olfactory cells. *Translational psychiatry* 5, e663-e663.

562 Forrest, M.P., Parnell, E., Penzes, P., 2018. Dendritic structural plasticity and  
563 neuropsychiatric disease. *Nat Rev Neurosci* 19, 215-234.

564 Gandal, M.J., Zhang, P., Hadjimichael, E., Walker, R.L., Chen, C., Liu, S., Won, H.,  
565 van Bakel, H., Varghese, M., Wang, Y., Shieh, A.W., Haney, J., Parhami, S., Belmont,  
566 J., Kim, M., Moran Losada, P., Khan, Z., Mleczko, J., Xia, Y., Dai, R., Wang, D., Yang,  
567 Y.T., Xu, M., Fish, K., Hof, P.R., Warrell, J., Fitzgerald, D., White, K., Jaffe, A.E.,  
568 Psych, E.C., Peters, M.A., Gerstein, M., Liu, C., Iakoucheva, L.M., Pinto, D.,  
569 Geschwind, D.H., 2018. Transcriptome-wide isoform-level dysregulation in ASD,  
570 schizophrenia, and bipolar disorder. *Science* 362.

571 Hall, L.S., Medway, C.W., Pain, O., Pardinas, A.F., Rees, E.G., Escott-Price, V.,  
572 Pocklington, A., Bray, N.J., Holmans, P.A., Walters, J.T.R., Owen, M.J., O'Donovan,  
573 M.C., 2020. A transcriptome-wide association study implicates specific pre- and post-  
574 synaptic abnormalities in schizophrenia. *Hum Mol Genet* 29, 159-167.

575 Hill, M.J., Bray, N.J., 2012. Evidence that schizophrenia risk variation in the ZNF804A  
576 gene exerts its effects during fetal brain development. *American Journal of Psychiatry*  
577 169, 1301-1308.

578 Hill, M.J., Jeffries, A.R., Dobson, R.J., Price, J., Bray, N.J., 2012. Knockdown of the  
579 psychosis susceptibility gene ZNF804A alters expression of genes involved in cell  
580 adhesion. *Hum Mol Genet* 21, 1018-1024.

581 Huang, Y., Huang, J., Zhou, Q.X., Yang, C.X., Yang, C.P., Mei, W.Y., Zhang, L.,  
582 Zhang, Q., Hu, L., Hu, Y.Q., Song, N.N., Wu, S.X., Xu, L., Ding, Y.Q., 2020. ZFP804A  
583 mutant mice display sex-dependent schizophrenia-like behaviors. *Mol Psychiatry*.

584 Jones, K.A., Eng, A.G., Raval, P., Srivastava, D.P., Penzes, P., 2014. Scaffold protein  
585 X11alpha interacts with kalirin-7 in dendrites and recruits it to Golgi outposts. *J Biol*  
586 *Chem* 289, 35517-35529.



587 Lewis, D.A., Levitt, P., 2002. Schizophrenia as a disorder of neurodevelopment.  
588 Annual review of neuroscience 25, 409-432.

589 Mairet-Coello, G., Courchet, J., Pieraut, S., Courchet, V., Maximov, A., Polleux, F.,  
590 2013. The CAMKK2-AMPK kinase pathway mediates the synaptotoxic effects of Abeta  
591 oligomers through Tau phosphorylation. Neuron 78, 94-108.

592 Motulsky, H.J., Brown, R.E., 2006. Detecting outliers when fitting data with nonlinear  
593 regression—a new method based on robust nonlinear regression and the false  
594 discovery rate. BMC bioinformatics 7, 123.

595 O'Donovan, M.C., Craddock, N., Norton, N., Williams, H., Peirce, T., Moskvina, V.,  
596 Nikolov, I., Hamshere, M., Carroll, L., Georgieva, L., 2008. Identification of loci  
597 associated with schizophrenia by genome-wide association and follow-up. Nature  
598 genetics 40, 1053-1055.

599 Penzes, P., Cahill, M.E., Jones, K.A., VanLeeuwen, J.-E., Woolfrey, K.M., 2011.  
600 Dendritic spine pathology in neuropsychiatric disorders. Nature neuroscience 14, 285-  
601 293.

602 Rapoport, J., Giedd, J., Gogtay, N., 2012. Neurodevelopmental model of  
603 schizophrenia: update 2012. Molecular psychiatry 17, 1228-1238.

604 Ripke, S., Sanders, A.R., Kendler, K.S., Levinson, D.F., Sklar, P., Holmans, P.A., Lin,  
605 D.-Y., Duan, J., Ophoff, R.A., Andreassen, O.A., 2011. Genome-wide association  
606 study identifies five new schizophrenia loci. Nature genetics 43, 969.

607 Ripke, S., Walters, J.T., O'Donovan, M.C., 2020. Mapping genomic loci prioritises  
608 genes and implicates synaptic biology in schizophrenia. 2020.2009.2012.20192922.

609 Schneider, C.A., Rasband, W.S., Eliceiri, K.W., 2012. NIH Image to ImageJ: 25 years  
610 of image analysis. Nature methods 9, 671-675.

611 Schrode, N., Ho, S.M., Yamamuro, K., Dobbyn, A., Huckins, L., Matos, M.R., Cheng,  
612 E., Deans, P.J.M., Flaherty, E., Barretto, N., Topol, A., Alganem, K., Abadali, S.,  
613 Gregory, J., Hoelzli, E., Phatnani, H., Singh, V., Girish, D., Aronow, B.,  
614 McCullumsmith, R., Hoffman, G.E., Stahl, E.A., Morishita, H., Sklar, P., Brennand,  
615 K.J., 2019. Synergistic effects of common schizophrenia risk variants. *Nat Genet* 51,  
616 1475-1485.

617 Singgih, E.L., van der Voet, M., Schimmel-Naber, M., Brinkmann, E.L., Schenck, A.,  
618 Franke, B., 2021. Investigating cytosolic 5'-nucleotidase II family genes as candidates  
619 for neuropsychiatric disorders in *Drosophila* (114/150 chr). *Transl Psychiatry* 11, 55.

620 Smeland, O.B., Frei, O., Dale, A.M., Andreassen, O.A., 2020. The polygenic  
621 architecture of schizophrenia—Rethinking pathogenesis and nosology. *Nature*  
622 *Reviews Neurology* 16, 366-379.

623 Srivastava, D.P., Woolfrey, K.M., Penzes, P., 2011. Analysis of dendritic spine  
624 morphology in cultured CNS neurons. *JoVE (Journal of Visualized Experiments)*,  
625 e2794.

626 Tao, R., Cousijn, H., Jaffe, A.E., Burnet, P.W., Edwards, F., Eastwood, S.L., Shin,  
627 J.H., Lane, T.A., Walker, M.A., Maher, B.J., 2014. Expression of ZNF804A in human  
628 brain and alterations in schizophrenia, bipolar disorder, and major depressive disorder:  
629 a novel transcript fetally regulated by the psychosis risk variant rs1344706. *JAMA*  
630 *psychiatry* 71, 1112-1120.

631 Topol, A., English, J., Flaherty, E., Rajarajan, P., Hartley, B., Gupta, S., Desland, F.,  
632 Zhu, S., Goff, T., Friedman, L., 2015. Increased abundance of translation machinery  
633 in stem cell-derived neural progenitor cells from four schizophrenia patients.  
634 *Translational psychiatry* 5, e662-e662.

635 Williams, H.J., Norton, N., Dwyer, S., Moskvina, V., Nikolov, I., Carroll, L., Georgieva,  
636 L., Williams, N.M., Morris, D.W., Quinn, E.M., 2011. Fine mapping of ZNF804A and  
637 genome-wide significant evidence for its involvement in schizophrenia and bipolar  
638 disorder. *Molecular psychiatry* 16, 429-441.

639 Zhou, D., Xiao, X., Li, M., 2020. The schizophrenia risk isoform ZNF804A(E3E4)  
640 affects dendritic spine. *Schizophr Res* 218, 324-325.

641 Zhou, Y., Dong, F., Lanz, T., Reinhart, V., Li, M., Liu, L., Zou, J., Xi, H., Mao, Y., 2018.  
642 Interactome analysis reveals ZNF804A, a schizophrenia risk gene, as a novel  
643 component of protein translational machinery critical for embryonic  
644 neurodevelopment. *Molecular psychiatry* 23, 952-962.

645

## 646 **Figure Legends**

647

648 **Figure 1 – NT5C2 and ZNF804A form a protein complex and co-localise when**  
649 **expressed in hEK293 cells. (A)** Representative confocal image of hEK293T cells  
650 expressing HA-ZNF804A and stained for F-actin. Ectopically expressed HA-ZNF804A  
651 localises to cell cytoplasm and plasma membrane (yellow arrows). Near the plasma  
652 membrane, HA-ZNF804A co-localises with F-actin. **(B)** Representative confocal  
653 image of hEK293T cells expressing myc-NT5C2 and stained for F-actin. Ectopically  
654 expressed myc-NT5C2 localises to cell cytoplasm (yellow arrows) similar to previous  
655 descriptions. **(C)** Confocal images of untransfected hEK293T cells and cells co-  
656 transfected with HA-ZNF804A and myc-NT5C2. In co-expressing cells, HA-ZNF804A  
657 and myc-NT5C2 are found to co-localise to the cell cytoplasm and near the plasma  
658 membrane (yellow arrows). Yellow dotted box indicates area magnified in (D). **(D) i) +**

659 **ii)** Intensity plot and magnified image of dotted box from (C), of co-localised HA-  
660 ZNF804A and myc-NT5C2. **(E)** Co-immunoprecipitation (co-IP) assay of hEK293T  
661 cells co-expressing HA-ZNF804A and myc-NT5C2. Cell lysates were  
662 immunoprecipitated with a myc antibody to isolate NT5C2 and interacting partner.  
663 Samples were subjected to immunoblotting and then subsequently probed with  
664 antibodies for myc (to detect myc-NT5C2) and HA (to detect HA-ZNF804A). A specific  
665 band for HA-ZNF804A was detected in co-IP'ed cell lysates expressing both proteins  
666 but not from untransfected cell lysate. Scale bar = 5  $\mu$ m.

667

668 **Figure 2 – Synaptic localisation of ZNF804A and NT5C2 in cortical neurons. (A)**

669 Western Blotting of cell fractions generated from mouse cortex. S1, extranuclear cell  
670 lysate; P2, crude synaptosomal fraction; S2 cytosol; P2S, synaptosomal supernatant,  
671 P2P, synaptosomal precipitate. ZFP804A and NT5C2 were present in all fractions;  
672 ZFP804A and NT5C2 was enriched in P2S compared to P2P fractions, whereas  
673 NT5C2 was abundant in S2 fraction. PSD-95 was used to demonstrate synaptosomal  
674 enrichment, and  $\beta$ -actin as a loading control. **(B)** Representative confocal image of a  
675 section of dendrite from DIV20 cortical neurons immunostained for MAP2  
676 (morphological marker) and a previously validated antibody for ZNF804A/ZFP804A.  
677 Yellow arrows indicate localisation of ZFP804A along dendrites, whereas white arrow  
678 heads indicate presence of protein in synaptic regions. Box and whisker plots, showing  
679 maximum and minimum values, is of ZFP804A linear density in either dendrites or  
680 synaptic region; n = 51 cells from 3 independent experiments. **(C)** Representative  
681 confocal image of a section of dendrite from DIV20 cortical neurons immunostained  
682 for MAP2 (morphological marker) and a previously validated antibody for NT5C2.  
683 Yellow arrows indicate localisation of NT5C2 along dendrites, whereas white arrow

684 heads indicate presence of protein in synaptic regions. Box and whisker plots, showing  
685 maximum and minimum values, is of NT5C2 linear density in either dendrites or  
686 synaptic region; n = 51 cells from 3 independent experiments. Scale bar = 5  $\mu$ m.

687

688 **Figure 3 – NT5C2 and ZNF804A co-localise and form a protein complex near**

689 **synapses in cortical neurons. (A)** Representative confocal image of DIV 20 cortical

690 neurons immunostained for MAP2 (morphological marker), NT5C2 and ZFP804A.

691 Yellow arrows indicate co-localisation of NT5C2 and ZNF804A along dendrites,

692 whereas white arrow heads indicate co-localised puncta in synaptic regions. XZ and

693 YZ orthogonal view further demonstrate co-localisation of both proteins (orange

694 arrows). **(B and C)** Quantification of co-localisation: (B) density of NT5C2 puncta

695 positive for ZFP804A and (C) density of ZFP804A puncta positive for NT5C2 staining

696 along dendrites or within synaptic regions. N = 52 cells from 3 independent

697 experiments. **(D)** Co-immunoprecipitation (co-IP) assay of DIV 20 cortical neurons.

698 Cell lysates were immunoprecipitated with either an antibody against

699 ZNF804A/ZFP804A or against rabbit IgG (control). Samples were subjected to

700 immunoblotting and then subsequently probed with antibodies for NT5C2 and

701 ZNF804A. A specific band for ZNF804A was detected in the input, ZNF804A-IP and

702 flow through lanes as expected – no band was detected in the rabbit IgG-IP lane,

703 indicating the specificity of the assay. Probing with an antibody against NT5C2

704 revealed bands in the input, ZNF804A IP and flow through lanes, but not the rabbit

705 IgG-IP lane. This indicates that NT5C2 is part of a protein complex with ZNF804A.

706 Scale bar = 5  $\mu$ m.

707

708 **Figure 4 - Knockdown of *Zfp804a* causes the redistribution of NT5C2. (A)**

709 Representative confocal image of DIV20 cortical neurons either untransfected (blank)  
710 or transfected with a scramble siRNA (scramble) or an siRNA for *Zfp804a* (*Zfp804a*  
711 siRNA). Cells were immunostained for MAP2 (morphological marker) or with an  
712 antibody against ZFP804A. Yellow arrows and white arrow heads indicate localisation  
713 of ZFP804A along dendrites or within the synaptic region respectively. **(B)**  
714 Quantification of ZNF804A linear density in Blank, scramble or *Zfp804a* siRNA  
715 conditions. Box and whisker plots show minimum and maximum values of linear  
716 density. N = 15-18 cells from 4 independent experiments. **(C)** Representative confocal  
717 image of DIV20 cortical neurons, transfected as in (A). Cells were immunostained for  
718 MAP2 and NT5C2. Yellow arrows and white arrow heads indicate localisation of  
719 NT5C2 along dendrites or within the synaptic region respectively. **(D)** Quantification of  
720 NT5C2 linear density in Blank, scramble or *Zfp804a* siRNA conditions. Box and  
721 whisker plots show minimum and maximum values of linear density. N = 18 cells from  
722 4 independent experiments. Scale bar = 5  $\mu$ m.

723

724 **Figure 5 - Knockdown of *Nt5c2* causes the redistribution of ZNF804A. (A)**

725 Western blotting of cell lysates from DIV20 cortical neurons either untransfected  
726 (blank) or transfected with a scramble siRNA (scramble) or an siRNAs (A or B) for  
727 *Nt5c2* (*Nt5c2* siRNA A or *Nt5c2* siRNA B). Immunoblots were probed with antibodies  
728 against NT5C2 or  $\beta$ -actin (loading control). **(B)** Representative confocal image of  
729 DIV20 cortical neurons, either untransfected (blank) or transfected with a scramble  
730 siRNA (scramble) or an siRNA against *Nt5c2* (*Nt5c2* siRNA A). Cells were  
731 immunostained for MAP2 and ZFP804A. Yellow arrows and white arrow heads  
732 indicate localisation of ZFP804A along dendrites or within the synaptic region

733 respectively. **(C)** Quantification of ZNF804A linear density in Blank, scramble or *Nt5c2*  
734 siRNA A conditions. Box and whisker plots show minimum and maximum values of  
735 linear density. N = 15 cells from 3 independent experiments. Scale bar = 5  $\mu\text{m}$ .

736

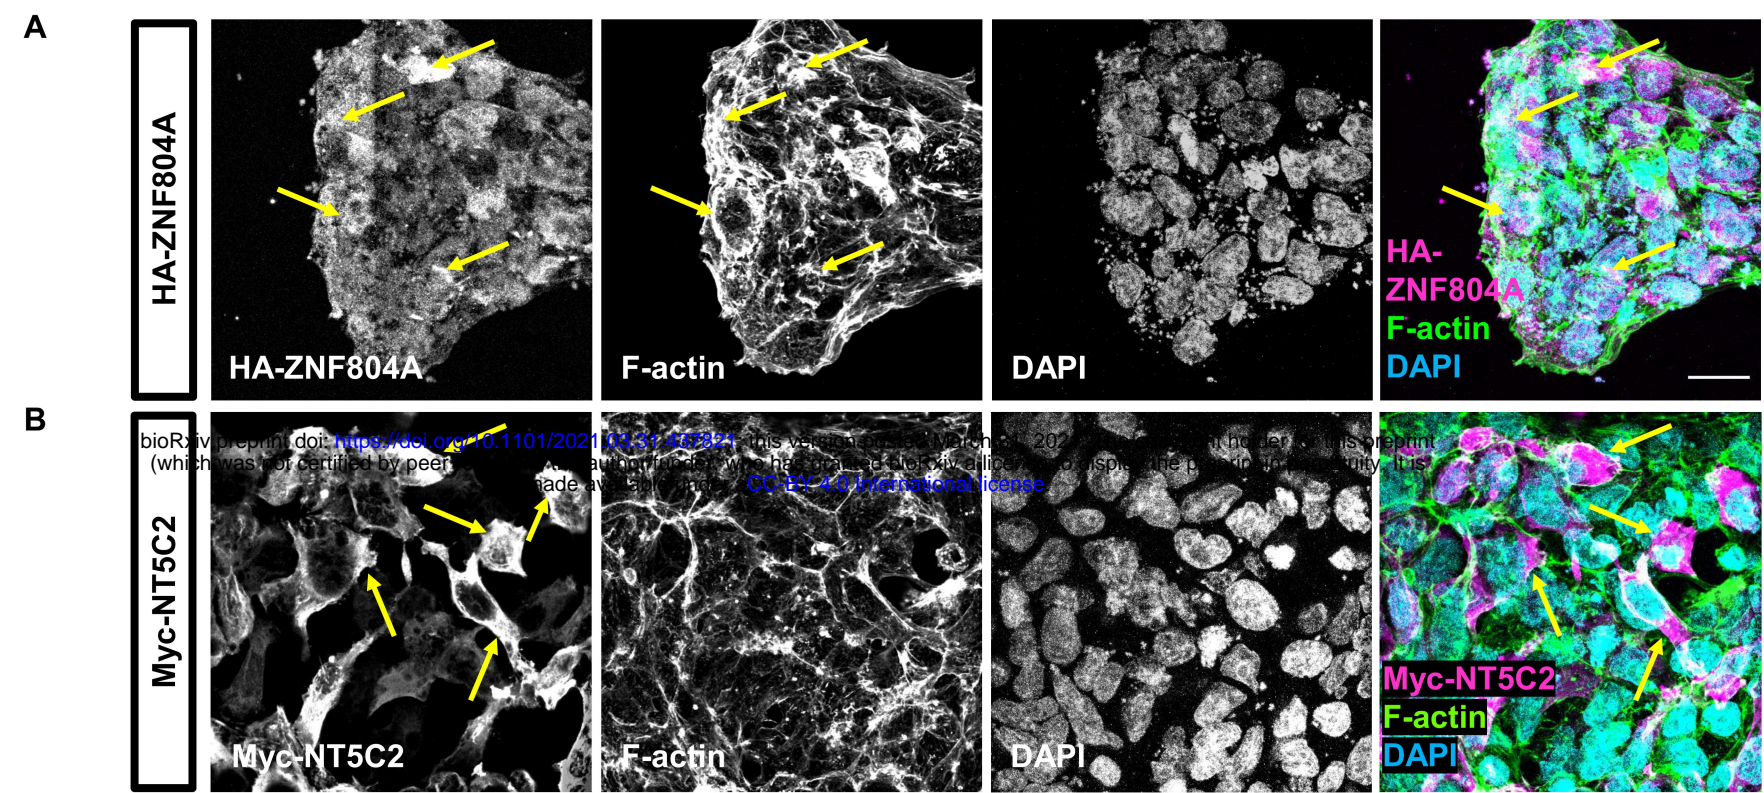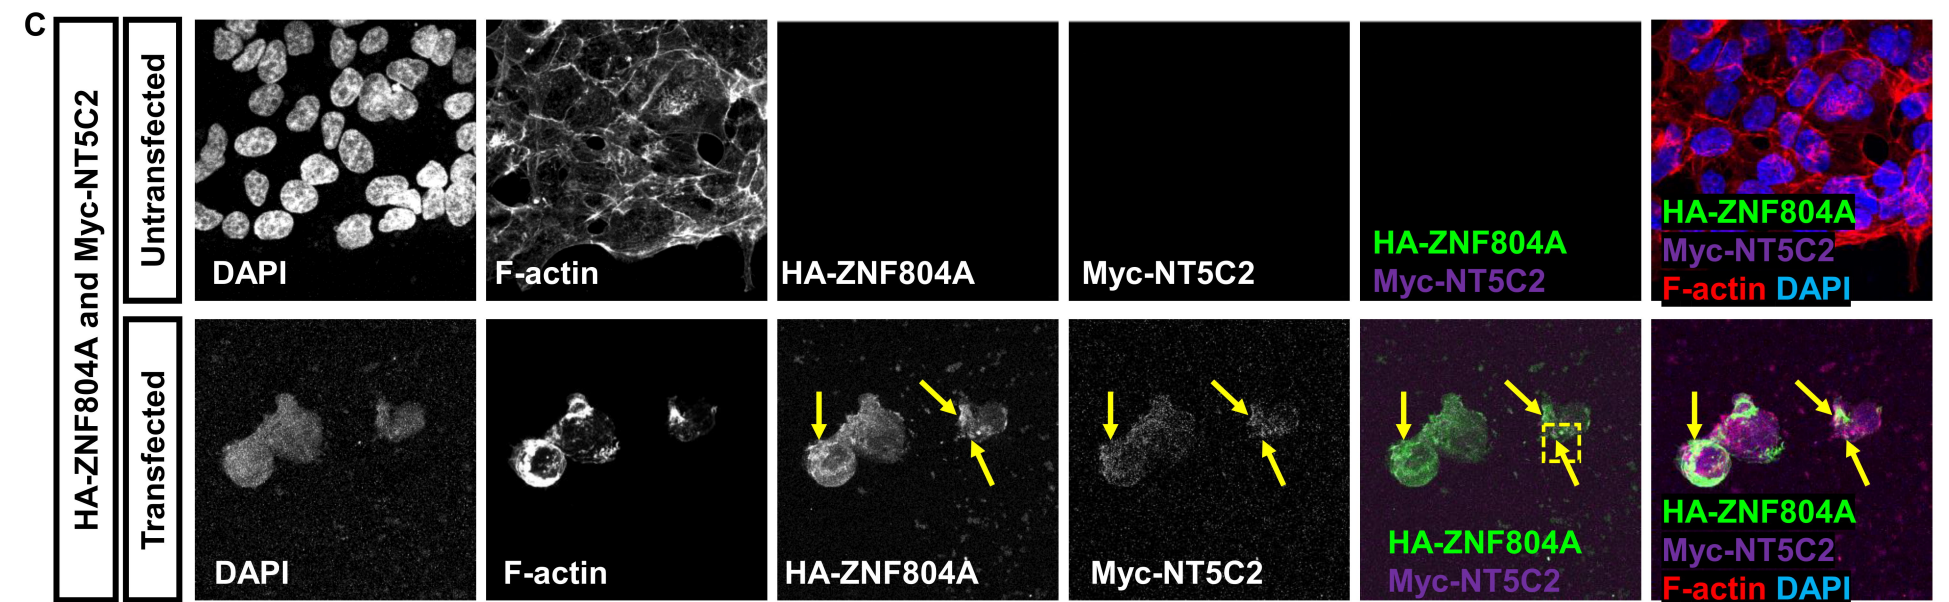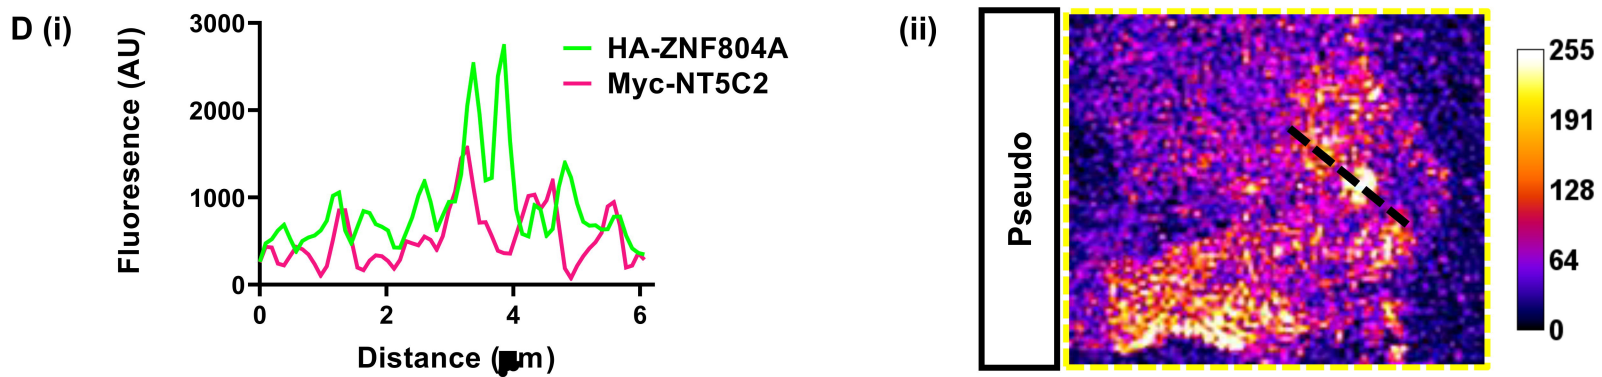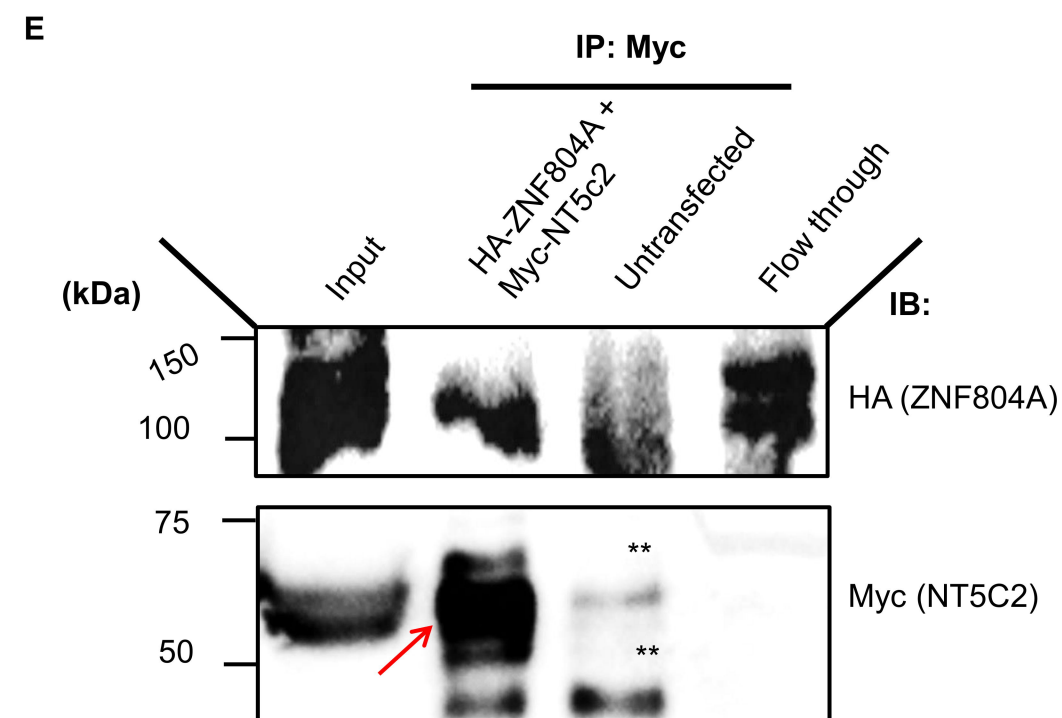



**A**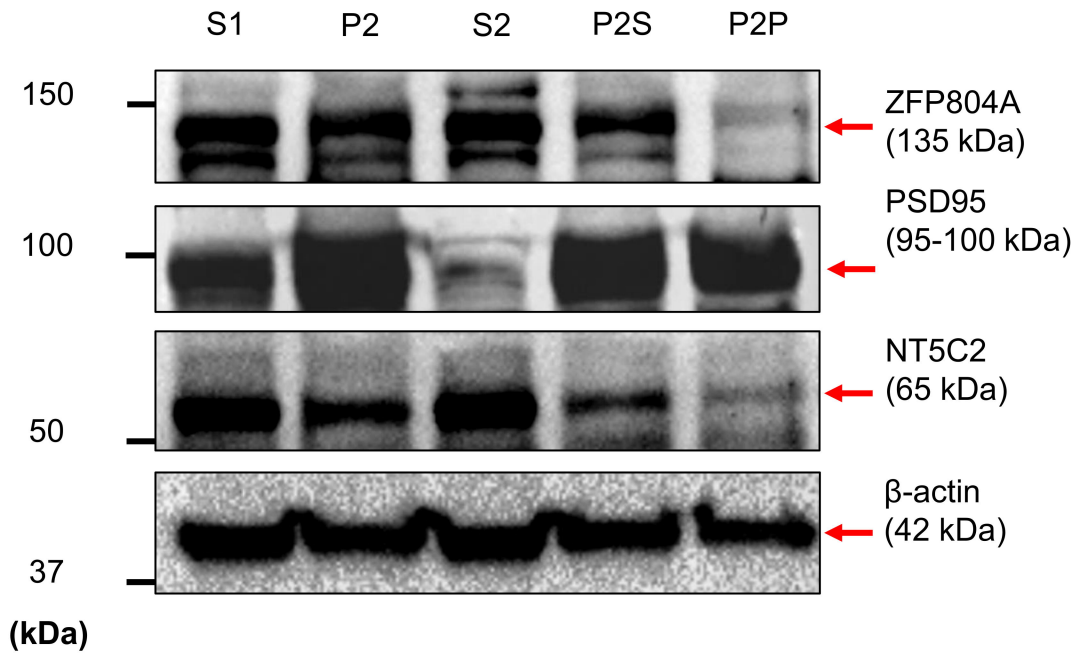**B**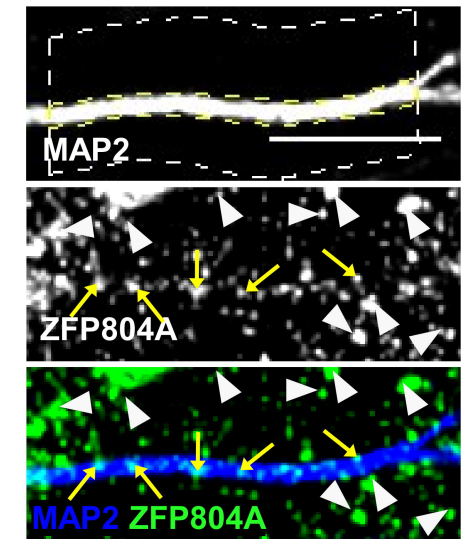**C**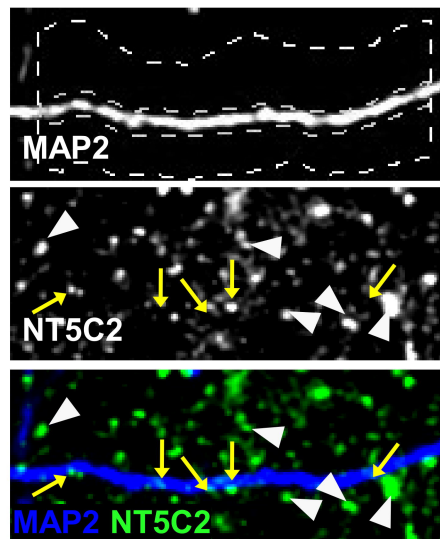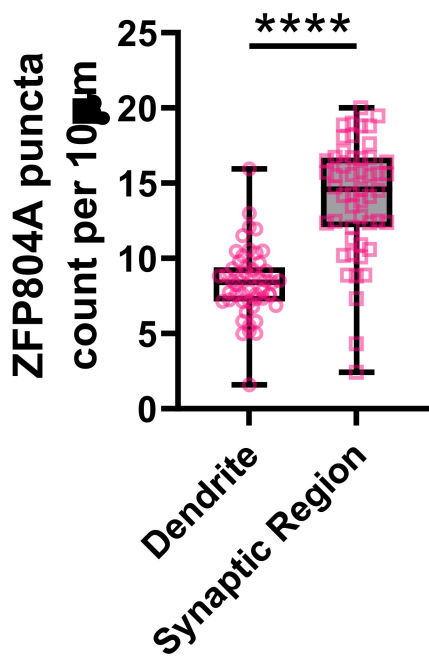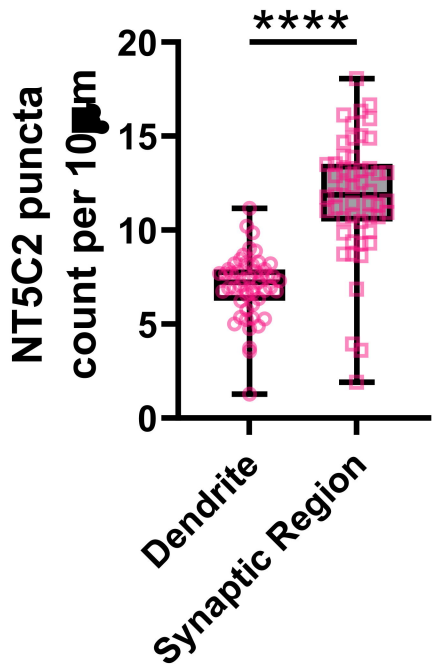

**A**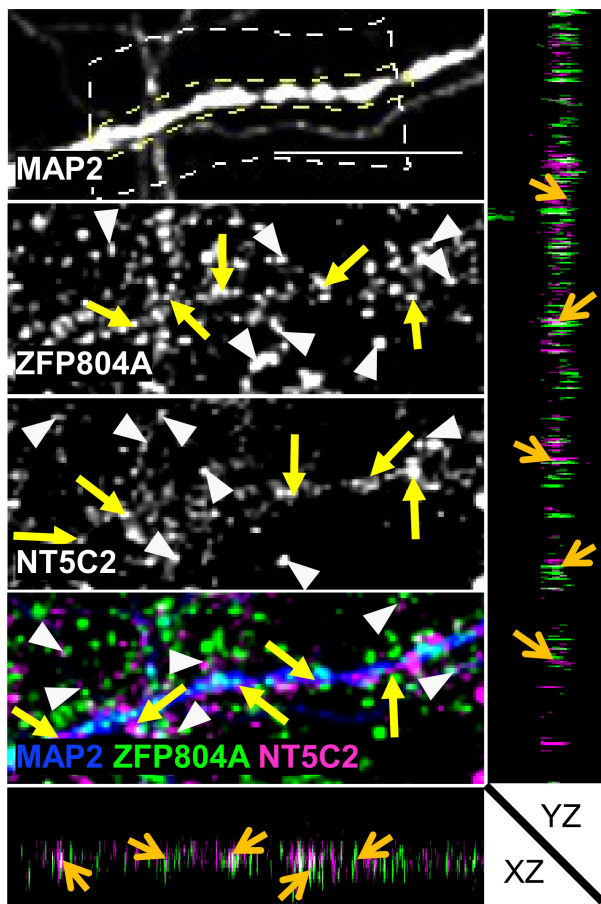**B**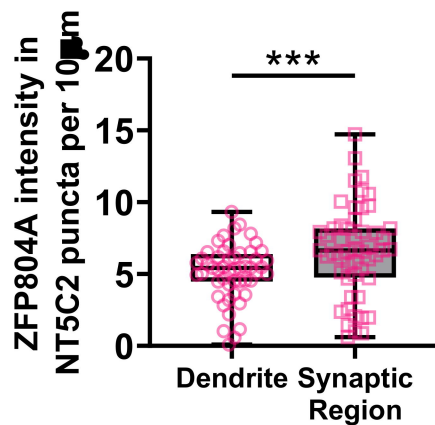**C**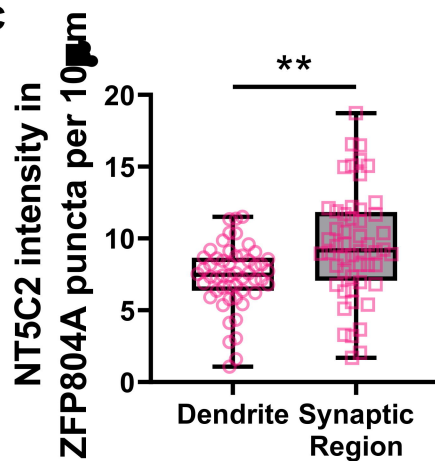**D**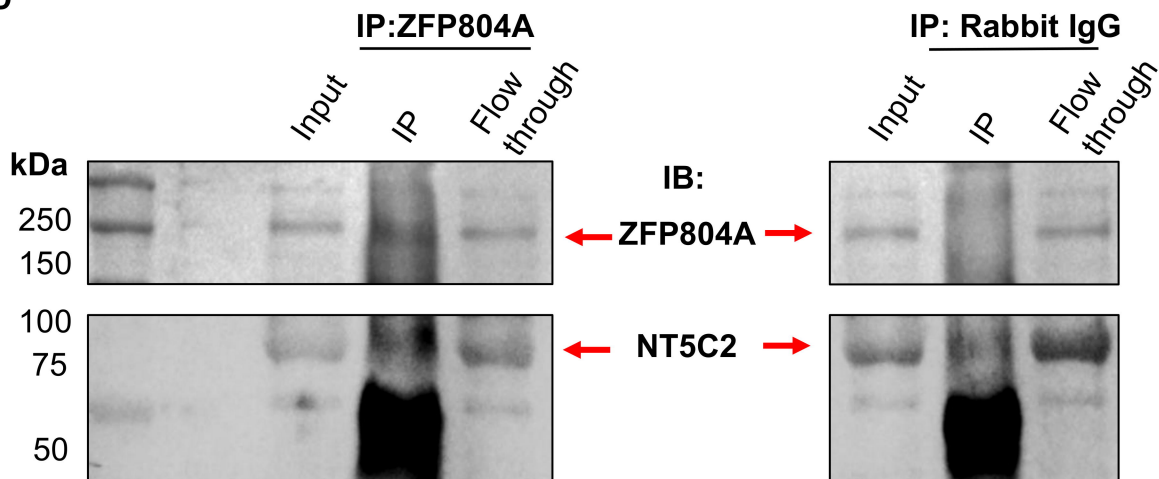

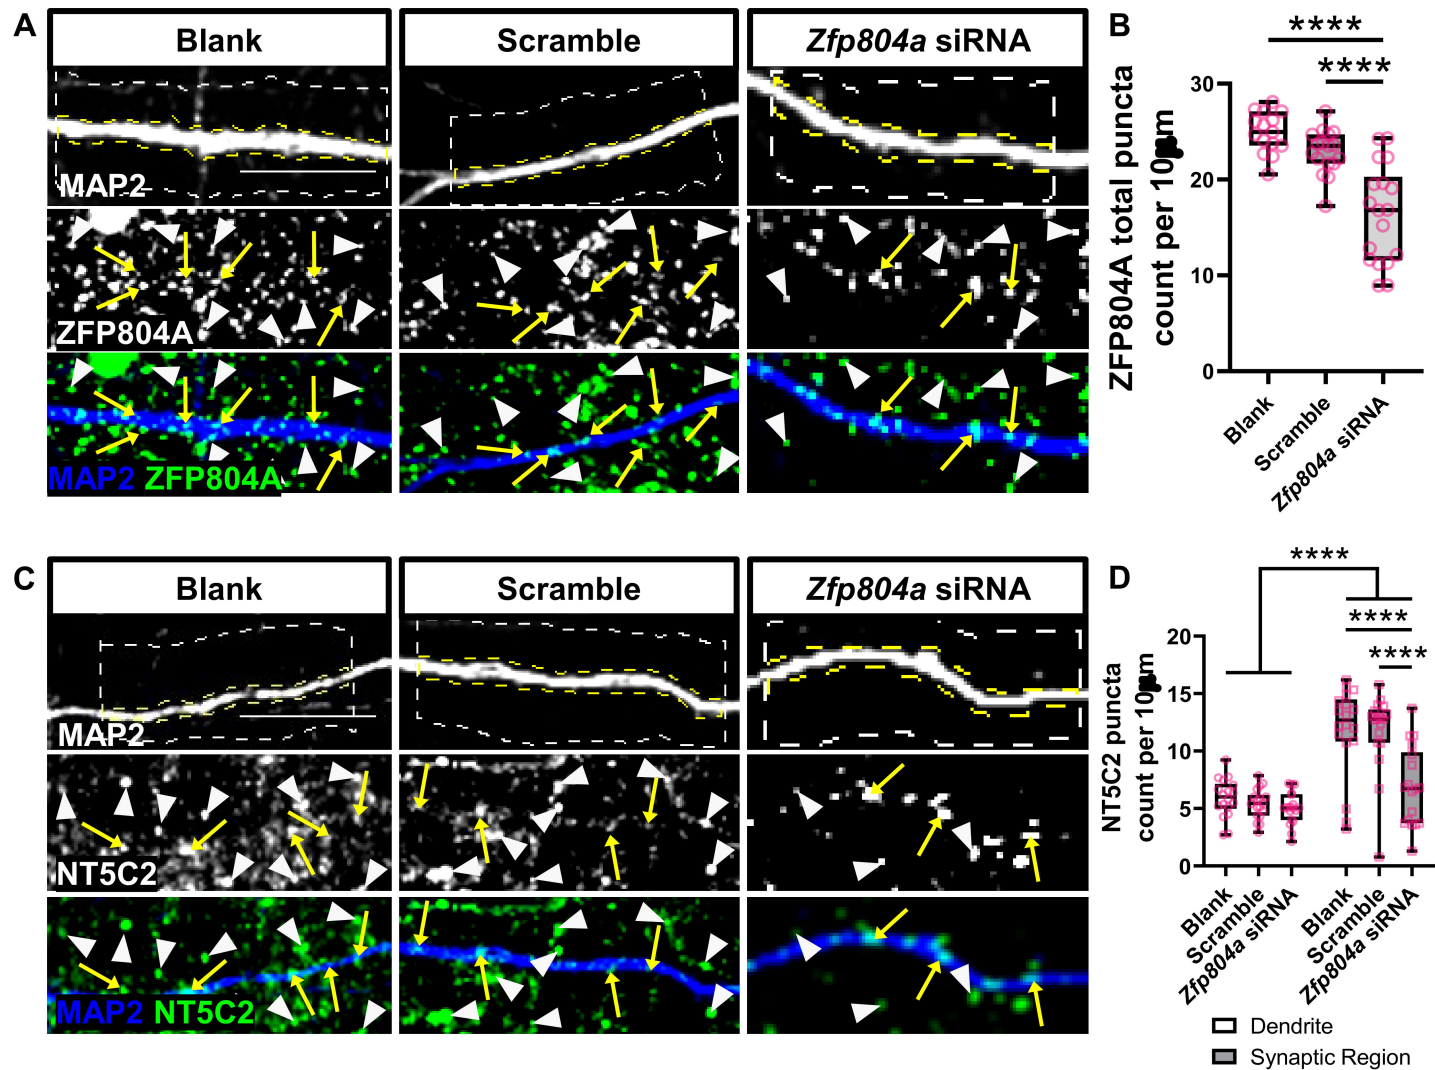

**A**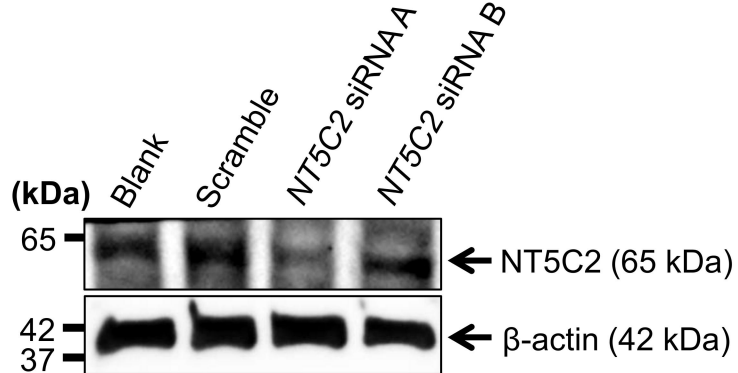**B**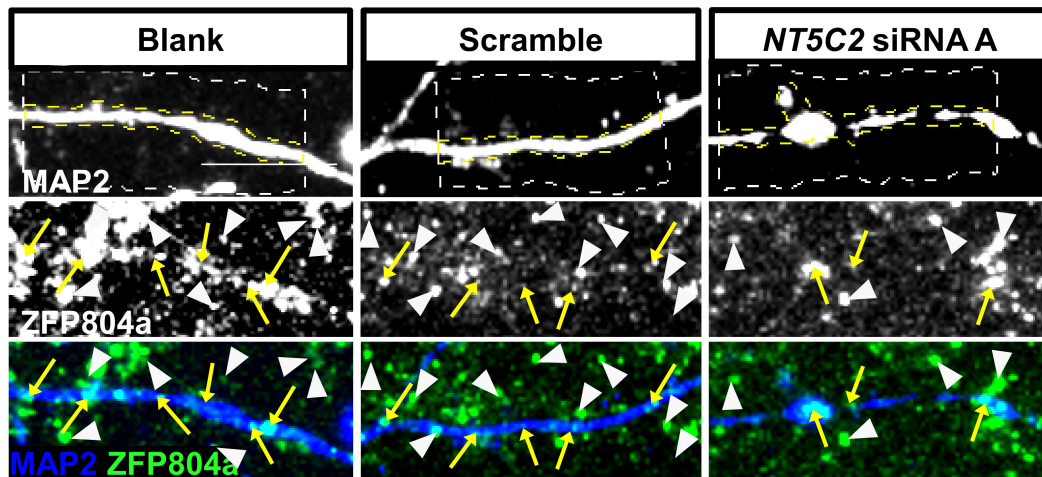**C**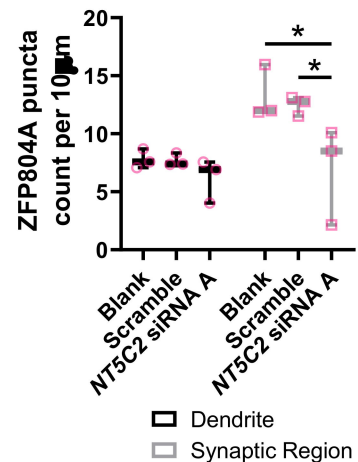

Source: https://www.biorxiv.org/content/10.1101/2021.03.31.437821v1.full.pdf
